# Supplementary material for: Monitoring inflammation injuries in the progression of atherosclerosis with contrast enhanced ultrasound molecular imaging
Source: PLoS One. 2017 Oct 5;12(10):e0186155. doi: 10.1371/journal.pone.0186155 (PMC5628944; doi:10.1371/journal.pone.0186155)
Supplement: S2 Table — (XLSX) [file pone.0186155.s002.xlsx]

## Sheet: Sheet1
Plaque Area Measurement on Masson's Samples
Plaque Area Ratio	32W	24W	16W	8W		ApoE-32w	Plaque Area	Total Area	Plaque Area Ratio
1	0.48	0.09	0.17	0.02		#1	275133	573195	0.48
2	0.239	0.25	0.096	0.02		#2	172700	724109	0.239
3	0.205	0.12	0.13	0.06		#3	183037	893389	0.205
4	0.247	0.42	0.123	0.08		#4	139685	566011	0.247
5	0.249	0.1	0.0813	0.01		#5	182165	732160	0.249
6	0.33	0.21	0.19	0.01		#6	332789	1008102	0.33
7	0.6	0.19	0.08			#7	439251	732085	0.6
8	0.22	0.23				#8	232794	1057018	0.22
9	0.251					#9	182921	727957	0.251
Mean	0.313444	0.20125	0.124329	0.0333333		Mean			0.313444
StDev	0.136304	0.10723	0.0429176	0.0294392		StDev			0.136304
SEM	0.0454347	0.0379114	0.0162213	0.0120185		SEM			0.0454347
						ApoE-24w	Plaque Area	Total Area	Plaque Area Ratio
						#1	65629	729220	0.09
						#2	150366	601464	0.25
						#3	89480	745672	0.12
						#4	413677	984946	0.42
						#5	46728	467279	0.1
						#6	137524	654877	0.21
						#7	99832	525432	0.19
						#8	155684	676888	0.23
						Mean			0.20125
						StDev			0.10723
						SEM			0.0379114
						ApoE-16w	Plaque Area	Total Area	Plaque Area Ratio
						#1	256610	1466677	0.17
						#2	173121	1792063	0.096
						#3	202230	1548903	0.13
						#4	45355	349579	0.123
						#5	37181	997304	0.0813
						#6	166548	876567	0.19
						#7	60362	754533	0.08
						Mean			0.124329
						StDev			0.0429176
						SEM			0.0162213
						ApoE-8w	Plaque Area	Total Area	Plaque Area Ratio
						#1	24695	1234786	0.02
						#2	35798	1789899	0.02
						#3	47344	789077	0.06
						#4	86138	1076731	0.08
						#5	9897	989789	0.01
						#6	4354	435456	0.01
						Mean			0.0333333
						StDev			0.0294392
						SEM			0.0120185
